# Supplementary material for: Knowledge, Attitudes, and Practices regarding Soil-Transmitted Helminthiasis among Village Health Volunteers in Nakhon Si Thammarat Province, Thailand: A Cross-Sectional Study
Source: MDPI journal article supplement (doi:10.3390/tropicalmed7020033), 2022-02-19
Supplement: s1 [file s1]

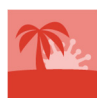

# Supplementary Materials

**Table S1.** Knowledge of soil-transmitted helminthiasis reported by the village health volunteers.

| Knowledge items                    |                                                                                                         | Total (n = 552) |               |               |
|------------------------------------|---------------------------------------------------------------------------------------------------------|-----------------|---------------|---------------|
|                                    |                                                                                                         | Yes             | No            | Not sure      |
| <b>Hookworm</b>                    |                                                                                                         |                 |               |               |
| 1.                                 | The larvae stage of hookworms lives in the soil.                                                        | 407<br>(79.7)   | 39<br>(7.1)   | 106<br>(19.2) |
| 2.                                 | When hookworm larvae enter into the body, they live in the stomach.                                     | 397<br>(71.9)   | 31<br>(5.6)   | 124<br>(22.5) |
| 3.                                 | Hookworm larvae are abundant in the rainy season.                                                       | 337<br>(61.1)   | 42<br>(7.6)   | 173<br>(31.3) |
| 4.                                 | Hookworm infection can cause anemia.                                                                    | 375<br>(67.9)   | 22<br>(4.0)   | 155<br>(28.1) |
| 5.                                 | Hookworm disease is prevented by always defecating in the toilet.                                       | 506<br>(91.7)   | 13<br>(2.3)   | 33<br>(6.0)   |
| <b><i>Trichuris trichiura</i></b>  |                                                                                                         |                 |               |               |
| 6.                                 | Trichuriasis is transmitted by eating food contaminated with the infective stage of eggs.               | 315<br>(57.1)   | 15<br>(2.7)   | 222<br>(40.2) |
| 7.                                 | Symptoms of trichuriasis include throbbing pain, blood in the stool, and colon bulging out of the anus. | 229<br>(41.5)   | 77<br>(13.9)  | 246<br>(44.6) |
| 8.                                 | The eggs of <i>Trichuris trichiura</i> are released from the body through saliva.                       | 124<br>(22.5)   | 167<br>(30.2) | 261<br>(47.3) |
| 9.                                 | Washing fresh vegetables thoroughly before eating can help prevent trichuriasis                         | 398<br>(72.1)   | 14<br>(2.5)   | 140<br>(25.4) |
| 10.                                | Wearing shoes while walking can help prevent trichuriasis.                                              | 394<br>(71.4)   | 48<br>(8.7)   | 110<br>(19.9) |
| <b><i>Ascaris lumbricoides</i></b> |                                                                                                         |                 |               |               |
| 11.                                | Ascariasis is caused by penetration of larvae via the skin.                                             | 280<br>(50.7)   | 112<br>(20.3) | 160<br>(29.0) |
| 12.                                | Symptoms of ascariasis are frequent abdominal pain, bloating, nausea, and vomiting.                     | 407<br>(73.7)   | 15<br>(2.7)   | 130<br>(23.6) |

| Knowledge items                         |                                                                                      | Total (n = 552) |              |               |
|-----------------------------------------|--------------------------------------------------------------------------------------|-----------------|--------------|---------------|
|                                         |                                                                                      | Yes             | No           | Not sure      |
| 13.                                     | Ascariasis can cause pneumonia and small intestine obstruction.                      | 288<br>(52.2)   | 42<br>(7.6)  | 222<br>(40.2) |
| 14.                                     | The eggs of <i>Ascaris lumbricoides</i> contaminate vegetables.                      | 296<br>(53.6)   | 85<br>(15.4) | 171<br>(31.0) |
| 15.                                     | Washing fresh vegetables thoroughly before eating can help prevent ascariasis.       | 390<br>(70.7)   | 42<br>(7.6)  | 120<br>(21.7) |
| <b><i>Strongyloides stercoralis</i></b> |                                                                                      |                 |              |               |
| 16.                                     | Larvae of <i>Strongyloides stercoralis</i> live in the soil.                         | 339<br>(61.4)   | 73<br>(13.2) | 140<br>(25.4) |
| 17.                                     | Larvae of <i>Strongyloides stercoralis</i> can penetrate through the skin.           | 357<br>(64.7)   | 73<br>(13.2) | 122<br>(22.1) |
| 18.                                     | Symptoms of strongyloidiasis include itching between the fingers.                    | 314<br>(56.9)   | 83<br>(15.0) | 155<br>(28.1) |
| 19.                                     | A blood test can help diagnose strongyloidiasis.                                     | 228<br>(41.3)   | 86<br>(15.6) | 238<br>(43.1) |
| 20.                                     | Wearing shoes every time before leaving the house can help prevent strongyloidiasis. | 425<br>(77.0)   | 43<br>(7.8)  | 84<br>(15.2)  |

**Table S2.** Attitudes of soil-transmitted helminthiasis reported by the village health volunteers.

| Attitudes items |                                                                                                  | Total (n = 552) |             |               |
|-----------------|--------------------------------------------------------------------------------------------------|-----------------|-------------|---------------|
|                 |                                                                                                  | Agree           | Disagree    | Not sure      |
| 1.              | A person should go for a stool examination for parasites once a year.                            | 543<br>(98.4)   | 6<br>(1.1)  | 3<br>(0.5)    |
| 2.              | If there is a training about soil-transmitted helminthiasis, I will attend the training.         | 464<br>(84.1)   | 9<br>(1.6)  | 79<br>(14.3)  |
| 3.              | I would like to contribute to prevent soil-transmitted helminthiasis in the community.           | 481<br>(87.1)   | 8<br>(1.5)  | 63<br>(11.4)  |
| 4.              | Eating unsanitary vegetables can cause a parasitic disease that can be transmitted through soil. | 433<br>(78.5)   | 41<br>(7.4) | 78<br>(14.1)  |
| 5.              | Soil-transmitted helminthiasis can cause anemia.                                                 | 336<br>(60.9)   | 27<br>(4.9) | 189<br>(34.2) |

| Attitudes items |                                                                                                                                    | Total (n = 552) |               |               |
|-----------------|------------------------------------------------------------------------------------------------------------------------------------|-----------------|---------------|---------------|
|                 |                                                                                                                                    | Agree           | Disagree      | Not sure      |
| 6.              | Parents play an important role in preventing parasites infection in children.                                                      | 482<br>(87.3)   | 10<br>(1.8)   | 60<br>(10.9)  |
| 7.              | Some soil-transmitted helminthiasis can be fatal.                                                                                  | 307<br>(55.6)   | 36<br>(6.5)   | 209<br>(37.9) |
| 8.              | Children are more likely to contract helminths that are transmitted through soil than adults.                                      | 484<br>(87.7)   | 25<br>(4.5)   | 43<br>(7.8)   |
| 9.              | Soil-transmitted helminthiasis can be prevented.                                                                                   | 496<br>(89.9)   | 11<br>(2.0)   | 45<br>(8.1)   |
| 10.             | Adults are less likely to get soil-transmitted helminthiasis than children because they have more immunity to parasites.           | 284<br>(51.4)   | 124<br>(22.5) | 144<br>(26.1) |
| 11.             | Prevention of soil-transmitted helminthiasis is the responsibility of public health officials only.                                | 96<br>(17.4)    | 360<br>(65.2) | 96<br>(17.4)  |
| 12.             | Walking barefoot on soil lowers the chance of contracting helminths that are transmitted through soil.                             | 106<br>(19.2)   | 385<br>(69.7) | 61<br>(11.1)  |
| 13.             | Fresh vegetables should not be washed for a long time because it will cause the loss of nutritional value.                         | 101<br>(18.3)   | 396<br>(71.7) | 55<br>(10.0)  |
| 14.             | Only highly educated people can prevent soil-transmitted helminthiasis.                                                            | 67<br>(12.1)    | 447<br>(81.0) | 38<br>(6.9)   |
| 15.             | Defecation in the toilet helps the spread of soil-transmitted helminthiasis.                                                       | 507<br>(91.9)   | 20<br>(3.6)   | 25<br>(4.5)   |
| 16.             | Soil-transmitted helminthiasis is usually transmitted within families only.                                                        | 74<br>(13.4)    | 371<br>(67.2) | 107<br>(19.4) |
| 17.             | Parasites cannot live on the ground for long periods.                                                                              | 120<br>(21.7)   | 167<br>(30.3) | 265<br>(48.0) |
| 18.             | When parasites are transmitted through soil into the body, the symptoms can be clearly seen.                                       | 146<br>(26.5)   | 142<br>(25.7) | 264<br>(47.8) |
| 19.             | Washing your hands after going to the toilet has no effect on the spread of helminths.                                             | 207<br>(37.5)   | 250<br>(45.3) | 95<br>(17.2)  |
| 20.             | Soil-transmitted helminthiasis can be easily treated with anthelmintic drugs. It is not necessary to prevent infection in any way. | 142<br>(25.7)   | 281<br>(50.9) | 129<br>(23.4) |
| 21.             | To control soil-transmitted helminthiasis, all members should be given an annual de-worming medication.                            | 458<br>(83.0)   | 46<br>(8.3)   | 48<br>(8.7)   |

**Table S3.** Practices of soil-transmitted helminthiasis reported by the village health volunteers.

| Practices items |                                                              | Total (n = 552) |               |               |
|-----------------|--------------------------------------------------------------|-----------------|---------------|---------------|
|                 |                                                              | Usually         | Sometime      | Never         |
| 1.              | Wash your hands before eating.                               | 368<br>(66.7)   | 184<br>(33.3) | 0<br>(0)      |
| 2.              | Wash your hands before cooking.                              | 419<br>(75.9)   | 132<br>(23.9) | 1<br>(0.2)    |
| 3.              | Wash your hands after defecation.                            | 513<br>(92.9)   | 37<br>(6.7)   | 2<br>(0.4)    |
| 4.              | Wash fresh vegetables thoroughly before eating.              | 196<br>(35.5)   | 345<br>(62.5) | 11<br>(2.0)   |
| 5.              | Consume food that has been freshly prepared.                 | 517<br>(93.7)   | 35<br>(6.3)   | 0<br>(0)      |
| 6.              | Keep clothes clean.                                          | 481<br>(87.1)   | 70<br>(12.7)  | 1<br>(0.2)    |
| 7.              | Learn about soil-transmitted helminthiasis.                  | 379<br>(68.7)   | 169<br>(30.6) | 4<br>(0.7)    |
| 8.              | Maintain the cleanliness of the restrooms.                   | 445<br>(80.6)   | 99<br>(17.9)  | 8<br>(1.5)    |
| 9.              | Drink boiled and filtered water.                             | 150<br>(27.2)   | 313<br>(56.7) | 89<br>(16.1)  |
| 10.             | Keep your nails short.                                       | 355<br>(64.3)   | 160<br>(29.0) | 37<br>(6.7)   |
| 11.             | Biting your nails or sucking your fingers.                   | 532<br>(96.4)   | 10<br>(1.8)   | 10<br>(1.8)   |
| 12.             | Touching pets such as dogs and cats.                         | 29<br>(5.3)     | 80<br>(15.5)  | 443<br>(80.2) |
| 13.             | Wash your hands after touching pets.                         | 28<br>(5.1)     | 248<br>(44.9) | 276<br>(50.0) |
| 14.             | Defecation in a hygienic toilet.                             | 494<br>(89.5)   | 55<br>(10.0)  | 3<br>(0.5)    |
| 15.             | Defecation by digging a hole in the ground.                  | 134<br>(24.3)   | 376<br>(68.1) | 42<br>(7.6)   |
| 16.             | Defecate on the ground when going out to work in the garden. | 430<br>(77.9)   | 99<br>(17.9)  | 23<br>(4.2)   |

| Practices items |                                                                                   | Total (n = 552) |               |               |
|-----------------|-----------------------------------------------------------------------------------|-----------------|---------------|---------------|
|                 |                                                                                   | Usually         | Sometime      | Never         |
| 17.             | Wear shoes when going out.                                                        | 86<br>(15.6)    | 386<br>(69.9) | 80<br>(14.5)  |
| 18.             | Wear closed-toed shoes when going out.                                            | 36<br>(6.5)     | 120<br>(21.8) | 396<br>(71.7) |
| 19.             | Wear boots when leaving the house or going to work in the garden, farm, or field. | 14<br>(2.5)     | 5<br>(0.9)    | 533<br>(96.6) |
| 20.             | Walk barefoot on the ground when going to work in the garden or farm.             | 42<br>(7.6)     | 285<br>(51.6) | 255<br>(40.8) |
